# Supplementary material for: An electrochemical investigation of intermediates and processes involved in the catalyticreduction of dinitrogen by [HIPTN3N]Mo (HIPTN3N = (3,5-(2,4,6-i-Pr3C6H2)2C6H3NCH2CH2)3N)
Source: Royal Society of Chemistry journal article supplement (doi:10.1039/c1dt11287b), 2011-10-27

## Supplementary Information

An Electrochemical Investigation of Intermediates and Processes Involved in the Catalytic

Reduction of Dinitrogen by [HIPTN<sub>3</sub>N]Mo (HIPT = 3,5-(2,4,6-*i*-Pr<sub>3</sub>C<sub>6</sub>H<sub>2</sub>)<sub>2</sub>C<sub>6</sub>H<sub>3</sub>)

Thiruvengadam Munisamy and Richard R. Schrock\*

S.1. Cyclic voltammogram of 0.5 mM MoN<sub>2</sub> in PhF/Bu<sub>4</sub>NPF<sub>6</sub> showing peaks at -0.54 V, -0.08 V and 0.71 V vs. Fc<sup>+</sup>/Fc. WE: 0.5 mm Pt and *v*: 20 mV/s.

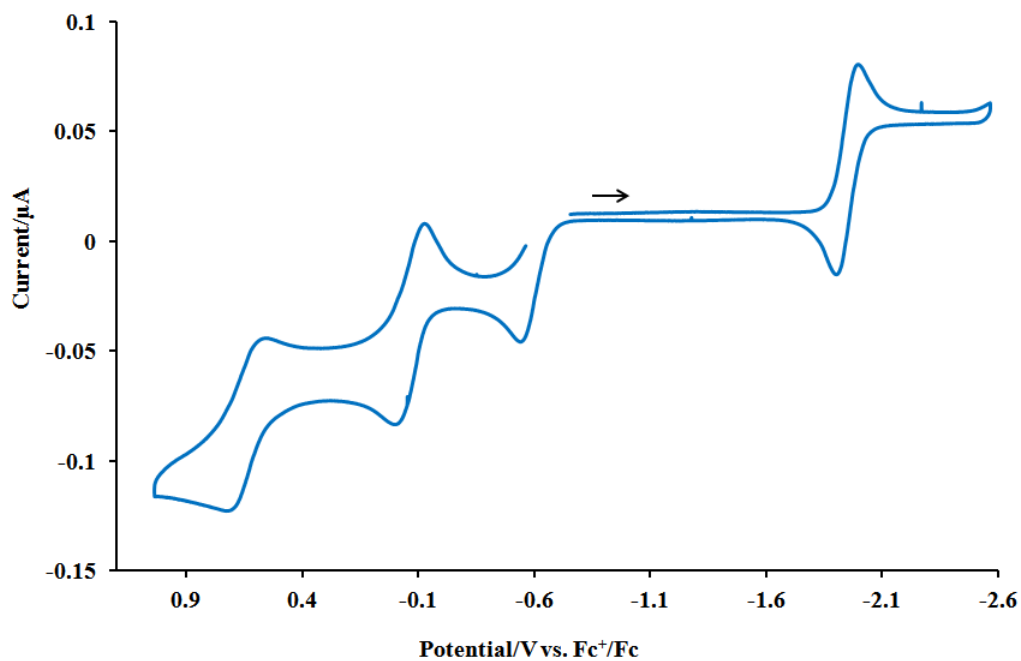

S.2. Cyclic voltammogram of 0.5 mM **MoN=NH** in PhF/ $\text{Bu}_4\text{NPF}_6$ . The potential scan starts at  $-0.74$  V vs.  $\text{Fc}^+/\text{Fc}$ . WE: 0.5 mm Pt and  $v$ : 20 mV/s.

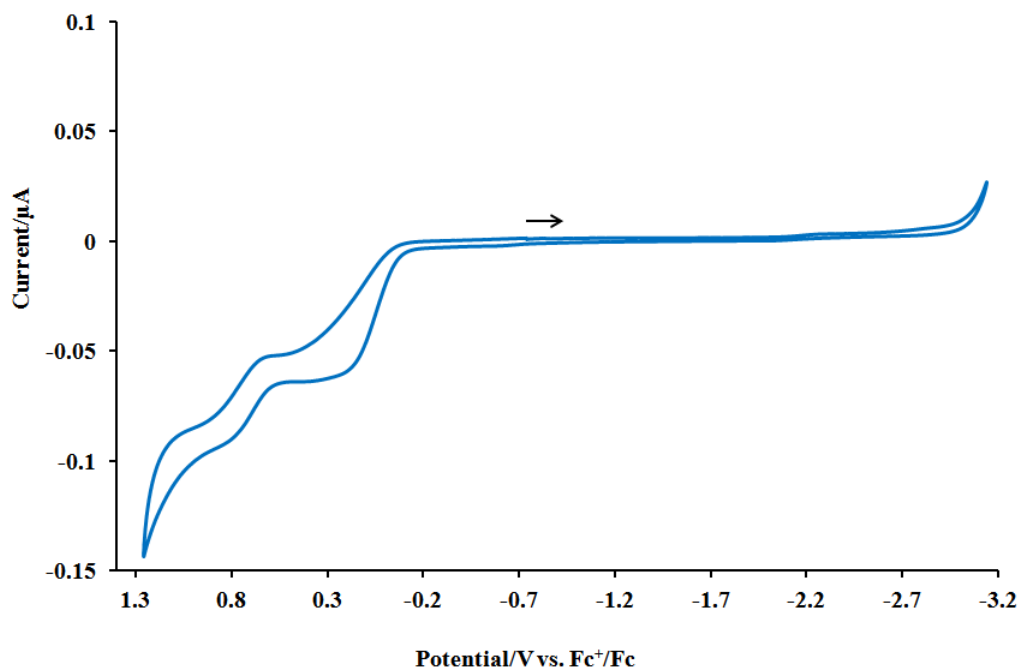

Supplement: c1dt11287b.pdf [file c1dt11287b.pdf]
